# Supplementary material for: Enhanced dielectric performance with high-temperature stability by interface-modulation of the core–shell structured imide-polymer@BT nanohybrids in PEI-based nanocomposites
Source: Royal Society of Chemistry journal article supplement (doi:10.1039/d3tc00552f), 2023-01-01
Supplement: d3tc00552f1.pdf [file d3tc00552f1.pdf]

## Supporting Information

### Enhanced Dielectric Performance with High-Temperature Stability by Interface- Modulation of the Core-Shell Structured Imide-Polymer@BT Nanohybrids in PEI-Based Nanocomposites

Jinpeng Li <sup>a</sup>, Junhao Jiang <sup>a</sup>, Yi Chen <sup>b\*</sup>, Xiaoyun Liu <sup>a</sup>, Peiyuan Zuo <sup>a</sup>, Qilin  
Cheng <sup>a</sup>, Qixin Zhuang <sup>a\*</sup>

<sup>a</sup> Key Laboratory of Advanced Polymer Materials of Shanghai, School of  
Material Science and Engineering, East China University of Science and Technology,  
Shanghai 200237, P.R. China

<sup>b</sup> Shanghai Spaceflight Precision Machinery Institute, Shanghai, 201108, P.R.  
China

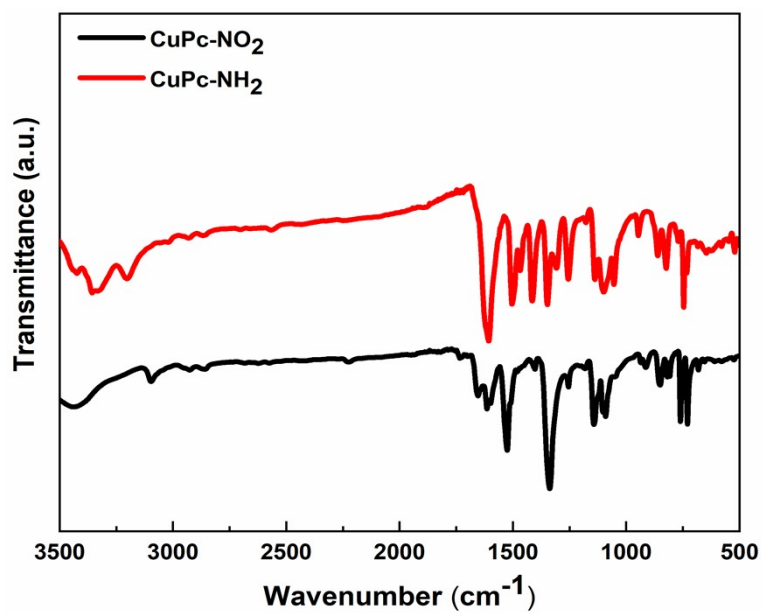

Fig. S1 FTIR spectra of CuPc-NO<sub>2</sub> and CuPc-NH<sub>2</sub>

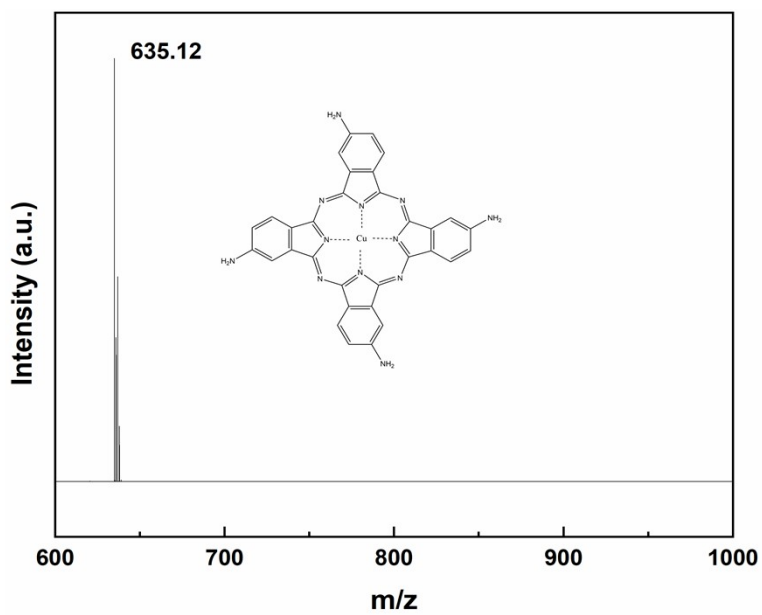

Fig. S2 Mass spectrometry of CuPc-NH<sub>2</sub>

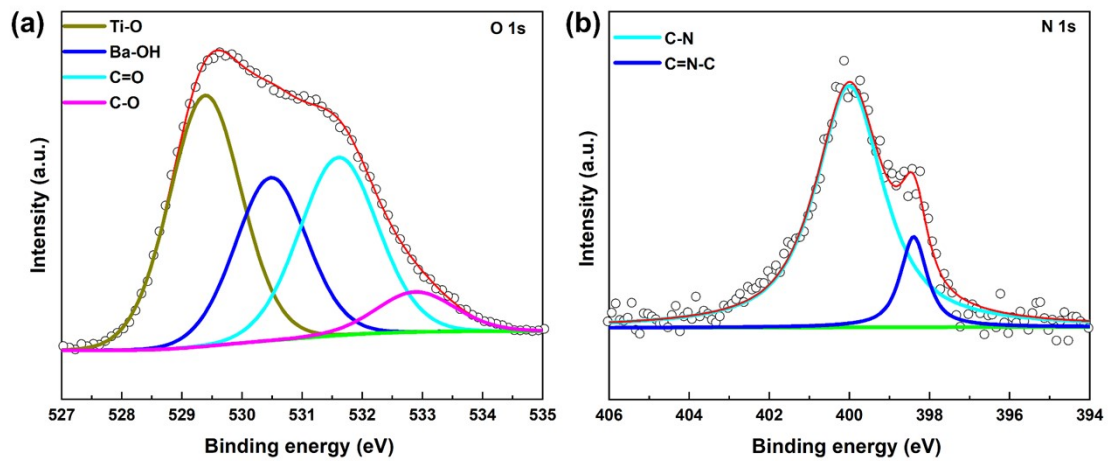

**Fig. S3** High-resolution O 1s (a) and N 1s (b) spectra of PcPFI@BT

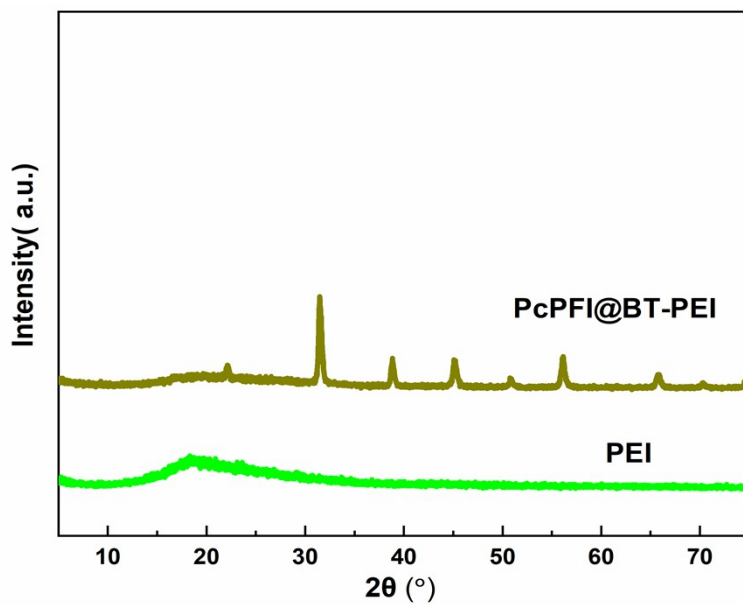

**Fig. S4** XRD patterns of PEI and 5vol% PcPFI@BT-PEI

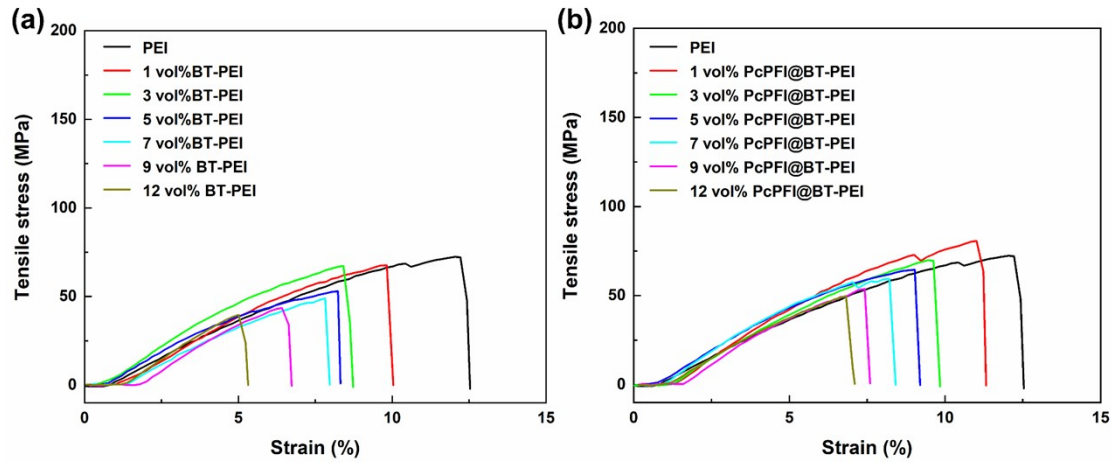

**Fig. S5** Stress-strain curves of BT-PEI (a) and PcPFI@BT-PEI (b) with the filler content from 0 to 12 vol%

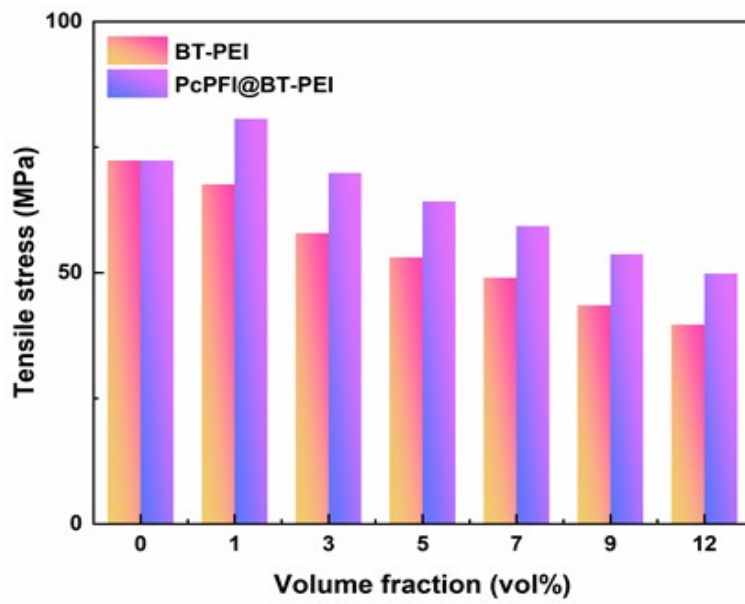

**Fig. S6** Tensile stress of the two sets of composites with filler content from 0 to 12 vol%

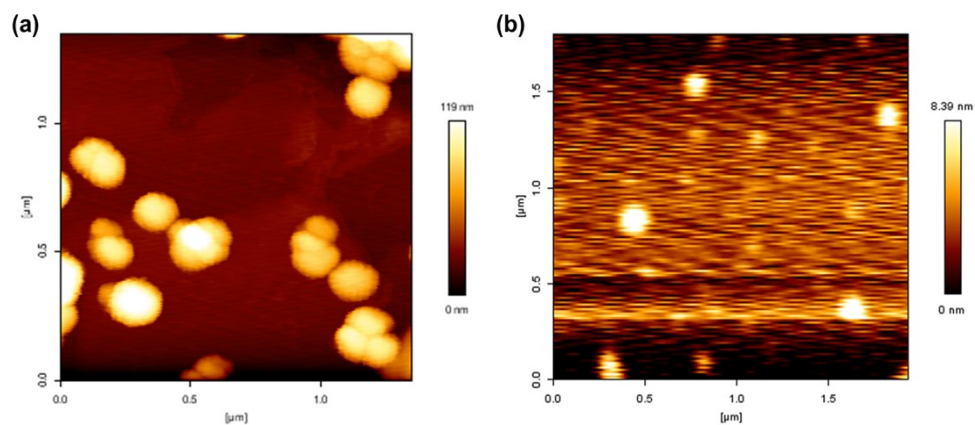

**Fig. S7** AFM images of BT-PEI (a) and PcPFI@BT-PEI (b)

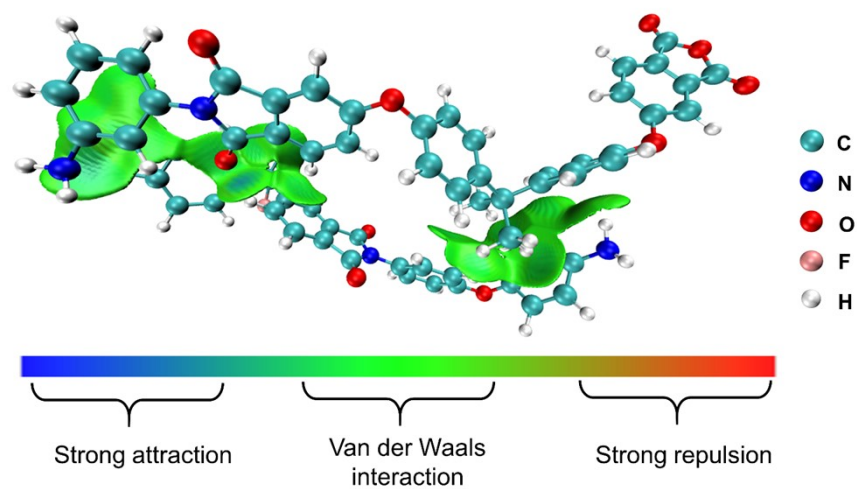

**Fig. S8** The intermolecular interaction between the similar components of PEI and PcPFI

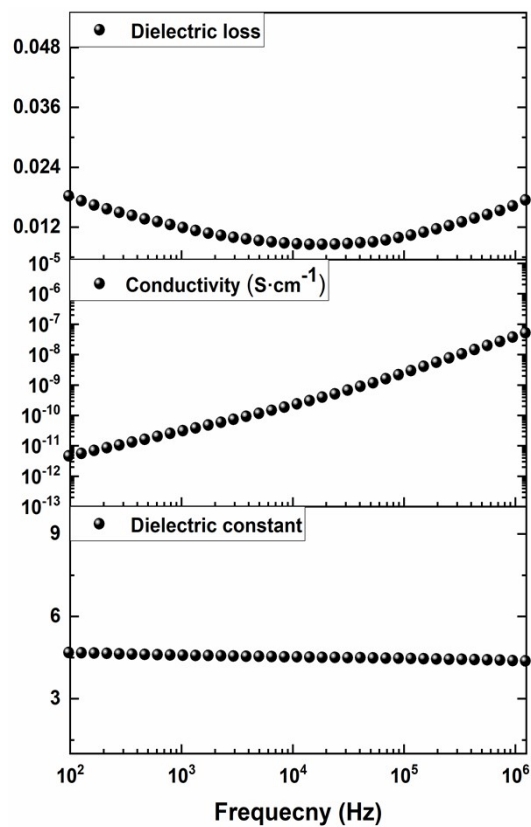

**Fig. S9** Dielectric properties of PcPFI polymer from  $10^2$  to  $10^6$  Hz

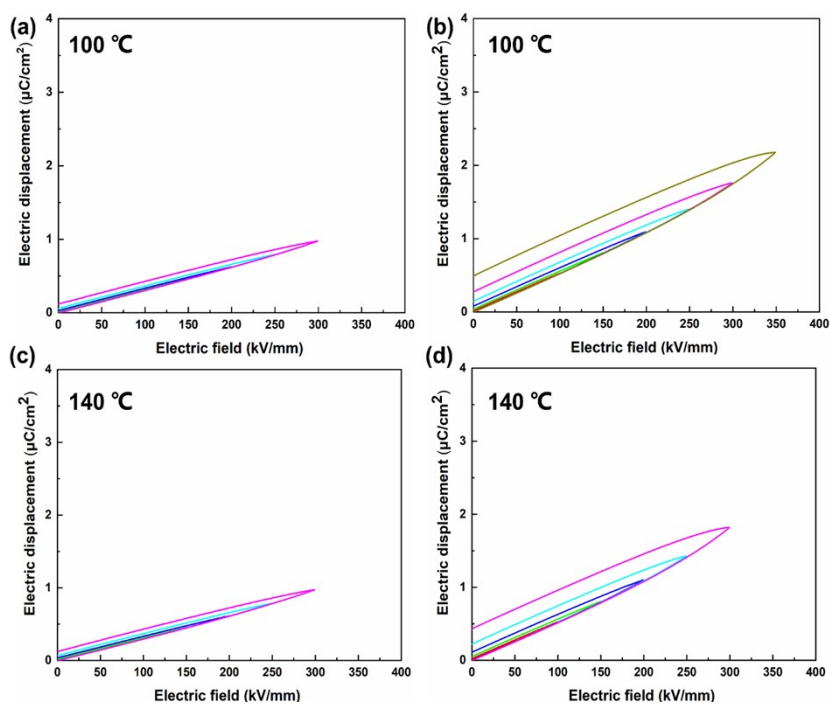

**Fig. S10** D-E loops of PEI ((a), (c)) and 1 vol% PcPFI@BT-PEI ((b), (d)) at 100 °C and 140 °C

**Table S1 The dielectric properties of the prepared composite and some related polymeric dielectrics reported in previous reports**

| Materials                                                                    | Dielectric Constant (1 kHz) | Dielectric Loss (1 kHz) | Breakdown Strength (kV/mm) | Energy storage density (J/cm <sup>3</sup> ) | Charge-discharge efficiency (%) | Ref              |
|------------------------------------------------------------------------------|-----------------------------|-------------------------|----------------------------|---------------------------------------------|---------------------------------|------------------|
| 10 vol% TiO <sub>2</sub> -BT-TiO <sub>2</sub> @dopa/PVDF                     | 12.6                        | 0.05                    | 312.8                      | 4.4                                         | ~30                             | S1               |
| 2 wt% PDA@BT/c-PVDF                                                          | ~11                         | ~0.07                   | 242                        | 2.9                                         | 75                              | S2               |
| 20 vol% BT-HCuPc/PES                                                         | ~9.8                        | ~0.044                  | ~290                       | 2.0                                         | 84                              | S3               |
| 5 wt% BT@PI/PVDF                                                             | 15                          | 0.046                   | 178.2                      | Not given                                   | Not given                       | S4               |
| 3 vol% BT-Bi(Li <sub>0.5</sub> Nb <sub>0.5</sub> )O <sub>3</sub> /P(VDF-HFP) | ~10                         | ~0.025                  | 497                        | 14.2                                        | 55.5                            | S5               |
| 10 wt% BNNSs/RC                                                              | 7                           | 0.02                    | 370                        | 4.1                                         | ~75                             | S6               |
| 10 vol% BT-1.2 vol% GO/P(VDF-HFP)                                            | 66.2                        | 0.048                   | 40                         | Not given                                   | Not given                       | S7               |
| 1 wt% HfO <sub>2</sub> @BT/P(VDF-HFP)                                        | ~10                         | ~0.016                  | 466.1                      | 10.7                                        | 68.1                            | S8               |
| 10 wt% BT-Ni(OH) <sub>2</sub> /P(VDF-HFP)                                    | 14.8                        | 0.038                   | 330                        | 7.13<br>(calculated)                        | Not given                       | S9               |
| <b>1 vol% PcPFI@BT/PEI</b>                                                   | <b>4.35</b>                 | <b>0.014</b>            | <b>381</b>                 | <b>3.04</b>                                 | <b>89.25</b>                    | <b>This work</b> |

## Reference

- S1 Prateek, R. Bhunia, S. Siddiqui, A. Garg and R. K. Gupta, *ACS Appl. Mater. Interfaces*, 2019, **11**, 14329-14339.
- S2 Y. Xie, Y. Yu, Y. Feng, W. Jiang and Z. Zhang, *ACS Appl. Mater. Interfaces*, 2017, **9**, 2995-3005.
- S3 W. Xu, G. Yang, L. Jin, J. Liu, Y. Zhang, Z. Zhang and Z. Jiang, *ACS Appl. Mater. Interfaces*, 2018, **10**, 11233-11241.
- S4 X. Xie, C. Yang, X.-d. Qi, J.-h. Yang, Z.-w. Zhou and Y. Wang, *Chem. Eng. J.*, 2019, **366**, 378-389.
- S5 P.-J. Wang, D. Zhou, J. Li, L.-X. Pang, W.-F. Liu, J.-Z. Su, C. Singh, S. Trukhanov and A. Trukhanov, *Nano Energy*, 2020, **78**, 105247.
- S6 J. Lao, H. Xie, Z. Shi, G. Li, B. Li, G.-H. Hu, Q. Yang and C. Xiong, *ACS Sustain. Chem. Eng.*, 2018, **6**, 7151-7158.
- S7 H. Luo, Z. Wu, X. Zhou, Z. Yan, K. Zhou and D. Zhang, *Compos. Sci. Technol.*, 2018, **160**, 237-244.
- S8 C. Chen, Y. Xie, J. Liu, J. Li, X. Wei and Z. Zhang, *Compos. Sci. Technol.*, 2020, **188**, 107968.
- S9 Y. Yang, C. Sun, H. Deng and Q. Fu, *Compos. Sci. Technol.*, 2020, **198**.
